# Supplementary figures and images for: Extracellular Vesicles and Cx43-Gap Junction Channels Are the Main Routes for Mitochondrial Transfer from Ultra-Purified Mesenchymal Stem Cells, RECs
Source: MDPI journal article supplement (doi:10.3390/ijms241210294), 2023-06-18

# Restoration of mitochondrial function by REC-derived mitochondria in the non-contact system

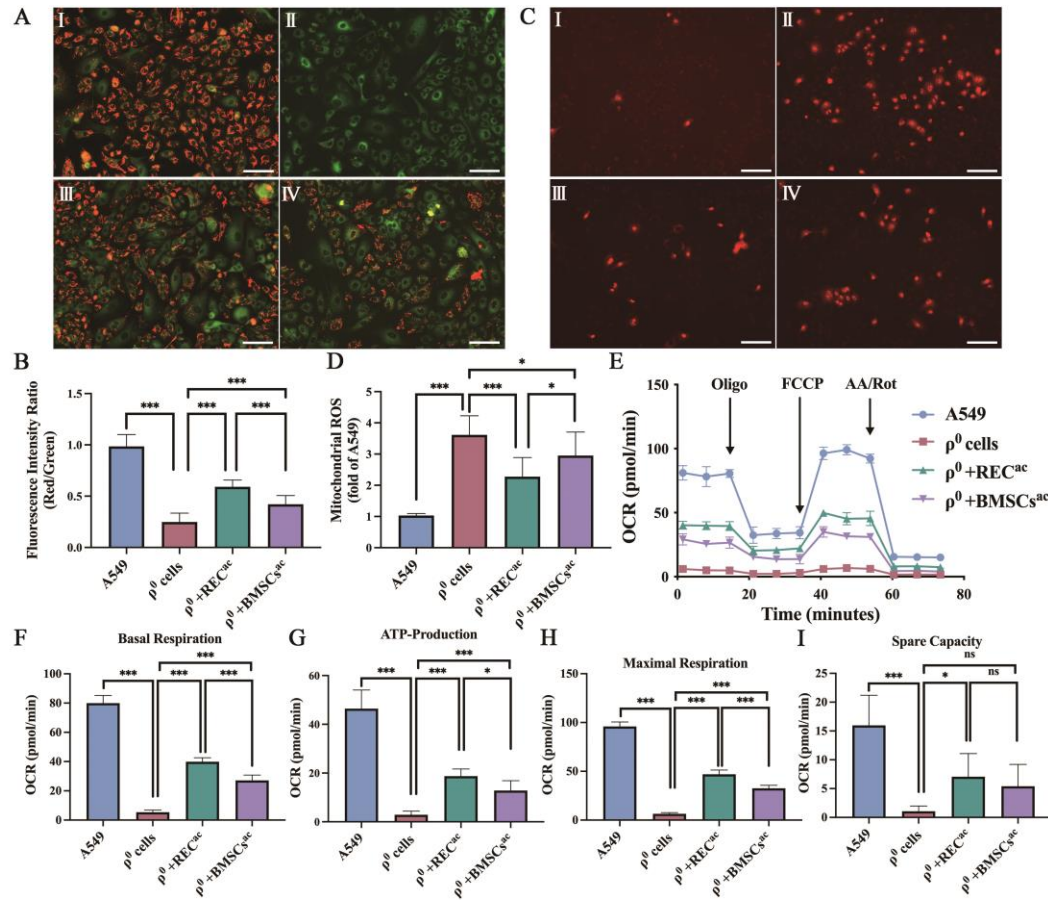

Supplement: s1 [file s1]
